# Supplementary material for: Study on polymorphisms in CHRNA5/CHRNA3/CHRNB4 gene cluster and the associated with the risk of non-small cell lung cancer
Source: PubMed Central journal article supplement (PMC5788651; doi:10.18632/oncotarget.23459), 2017-12-20
Supplement: oncotarget-09-2435-s001.pdf [file oncotarget-09-2435-s001.pdf]

## Study on polymorphisms in **CHRNA5/CHRNA3/CHRNA4** gene cluster and the associated with the risk of non-small cell lung cancer

### SUPPLEMENTARY MATERIALS

**Supplementary Table 1: Associations between three SNPs and lung cancer risk, stratified by age**

| Age   | Genotype  | Cases(%)  | Controls(%)        | OR(95% CI)          | P value            | OR <sub>adj.</sub> (95% CI) | P <sub>adj.</sub> |
|-------|-----------|-----------|--------------------|---------------------|--------------------|-----------------------------|-------------------|
| <=60  | rs6495309 |           |                    |                     |                    |                             |                   |
|       | CC        | 36(28.6)  | 34(24.1)           | Ref                 | 0.617              | Ref                         | 0.761             |
|       | CT        | 67(53.2)  | 76(53.9)           | 0.833(0.470-1.476)  | 0.53               | 1.089(0.579-2.048)          | 0.792             |
|       | TT        | 23(18.3)  | 31(22.0)           | 0.701(0.343-1.432)  | 0.329              | 0.833(0.378-1.836)          | 0.651             |
|       | CC+CT     | 103(81.7) | 110(78.0)          | Ref                 |                    | Ref                         |                   |
|       | TT        | 23(18.3)  | 31(22.0)           | 0.792(0.434-1.448)  | 0.449              | 0.788(0.402-1.546)          | 0.489             |
|       | rs8040868 |           |                    |                     |                    |                             |                   |
|       | TT        | 56(44.4)  | 68(49.3)           | Ref                 | 0.029              | Ref                         | 0.110             |
|       | TC        | 56(44.4)  | 67(48.6)           | 1.015(0.615-1.675)  | 0.954              | 0.984(0.566-1.711)          | 0.954             |
|       | CC        | 14(11.1)  | 3(02.2)            | 5.667(1.550-20.712) | 0.009*             | 4.213(1.062-16.708)         | 0.041*            |
|       | TT+TC     | 112(88.9) | 135(97.8)          | Ref                 |                    | Ref                         |                   |
|       | CC        | 14(11.1)  | 3(02.2)            | 5.625(1.577-20.067) | 0.008*             | 4.247(1.101-16.380)         | 0.036*            |
|       | rs1948    |           |                    |                     |                    |                             |                   |
|       | CC        | 24(19.2)  | 39(27.9)           | Ref                 | 0.258              | Ref                         | 0.165             |
|       | CT        | 74(59.2)  | 74(52.9)           | 1.625(0.890-2.967)  | 0.114              | 1.912(0.977-3.740)          | 0.058             |
| TT    | 27(21.6)  | 27(19.3)  | 1.625(0.778-3.396) | 0.197               | 1.657(0.737-3.726) | 0.222                       |                   |
| CC+CT | 98(78.4)  | 113(80.7) | Ref                |                     | Ref                |                             |                   |
| TT    | 27(21.6)  | 27(19.3)  | 1.153(0.634-2.097) | 0.641               | 1.052(0.546-2.028) | 0.879                       |                   |
| >60   | rs6495309 |           |                    |                     |                    |                             |                   |
|       | CC        | 54(30.2)  | 44(26.7)           | Ref                 | 0.736              | Ref                         | 0.756             |
|       | CT        | 86(48.0)  | 81(49.1)           | 0.865(0.524-1.427)  | 0.57               | 0.866(0.521-1.439)          | 0.579             |
|       | TT        | 39(21.8)  | 40(24.2)           | 0.794(0.439-1.439)  | 0.448              | 0.801(0.438-1.464)          | 0.471             |
|       | CC+CT     | 140(78.2) | 125(75.8)          | Ref                 |                    | Ref                         |                   |
|       | TT        | 39(21.8)  | 40(24.2)           | 0.871(0.527-1.439)  | 0.589              | 0.877(0.527-1.461)          | 0.614             |
|       | rs8040868 |           |                    |                     |                    |                             |                   |
|       | TT        | 68(38.0)  | 79(47.9)           | Ref                 | 0.181              | Ref                         | 0.240             |
|       | TC        | 92(51.4)  | 71(43.0)           | 1.505(0.962-2.357)  | 0.074              | 1.470(0.933-2.317)          | 0.097             |
|       | CC        | 19(10.6)  | 15(09.1)           | 1.472(0.695-3.117)  | 0.313              | 1.376(0.641-2.952)          | 0.412             |
|       | TT+TC     | 160(89.4) | 150(90.9)          | Ref                 |                    | Ref                         |                   |
|       | CC        | 19(10.6)  | 15(09.1)           | 1.188(0.582-2.422)  | 0.636              | 1.121(0.543-2.313)          | 0.757             |
|       | rs1948    |           |                    |                     |                    |                             |                   |
|       | CC        | 43(24.3)  | 52(31.7)           | Ref                 | 0.312              | Ref                         | 0.358             |
|       | CT        | 93(52.5)  | 77(47.0)           | 1.461(0.882-2.419)  | 0.141              | 1.430(0.857-2.386)          | 0.171             |
| TT    | 41(23.2)  | 35(21.3)  | 1.417(0.773-2.596) | 0.26                | 1.408(0.761-2.605) | 0.276                       |                   |
| CC+CT | 136(76.8) | 129(78.7) | Ref                |                     | Ref                |                             |                   |
| TT    | 41(23.2)  | 35(21.3)  | 1.111(0.666-1.853) | 0.686               | 1.120(0.666-1.883) | 0.670                       |                   |

\*P<0.05.

Supplementary Table 2: Associations between three SNPs and lung cancer risk, stratified by pathological subgroup

| Pathological subgroup   | Genotype  | Controls(%) | No.(%)             | OR(95% CI)         | P value            | OR <sub>adj.</sub> (95% CI) | P <sub>adj.</sub> |
|-------------------------|-----------|-------------|--------------------|--------------------|--------------------|-----------------------------|-------------------|
| Adenocarcinoma          | rs6495309 |             |                    |                    |                    |                             |                   |
|                         | CC        | 78(25.5)    | 43(28.6)           | Ref                | 0.642              | Ref                         | 0.812             |
|                         | CT        | 157(51.3)   | 62(52.1)           | 0.891(0.541-1.469) | 0.652              | 1.010(0.588-1.734)          | 0.972             |
|                         | TT        | 71(23.2)    | 23(19.3)           | 0.743(0.400-1.380) | 0.347              | 0.833(0.426-1.629)          | 0.594             |
|                         | CC+CT     | 235(76.8)   | 95(80.7)           | Ref                |                    | Ref                         |                   |
|                         | TT        | 71(23.2)    | 23(19.3)           | 0.801(0.473-1.358) | 0.41               | 0.828(0.467-1.469)          | 0.519             |
|                         | rs8040868 |             |                    |                    |                    |                             |                   |
|                         | TT        | 147(48.5)   | 43(36.4)           | Ref                | 0.04               | Ref                         | 0.238             |
|                         | TC        | 138(45.5)   | 62(52.2)           | 1.536(0.976-2.416) | 0.063              | 1.515(0.927-2.478)          | 0.098             |
|                         | CC        | 18(5.9)     | 13(11.0)           | 2.469(1.120-5.441) | 0.025*             | 1.449(0.635-3.304)          | 0.378             |
|                         | TT+TC     | 285(94.1)   | 105(89.0)          | Ref                |                    | Ref                         |                   |
|                         | CC        | 18(5.9)     | 13(11.0)           | 1.960(0.928-4.140) | 0.078              | 1.157(0.531-2.519)          | 0.714             |
|                         | rs1948    |             |                    |                    |                    |                             |                   |
|                         | CC        | 91(29.9)    | 25(21.4)           | Ref                | 0.137              | Ref                         | 0.190             |
|                         | CT        | 151(49.7)   | 70(59.8)           | 1.687(0.998-2.854) | 0.051              | 1.673(0.948-2.952)          | 0.076             |
| TT                      | 62(20.4)  | 22(18.8)    | 1.292(0.669-2.493) | 0.446              | 1.266(0.624-2.569) | 0.513                       |                   |
| CC+CT                   | 242(79.6) | 95(81.2)    | Ref                |                    | Ref                |                             |                   |
| TT                      | 62(20.4)  | 22(18.8)    | 0.904(0.526-1.553) | 0.714              | 0.891(0.497-1.598) | 0.698                       |                   |
| Squamous cell carcinoma | rs6495309 |             |                    |                    |                    |                             |                   |
|                         | CC        | 78(25.5)    | 39(28.9)           | Ref                | 0.748              | Ref                         | 0.832             |
|                         | CT        | 157(51.3)   | 67(49.6)           | 0.854(0.529-1.378) | 0.517              | 0.908(0.558-1.476)          | 0.696             |
|                         | TT        | 71(23.2)    | 29(21.5)           | 0.817(0.458-1.456) | 0.493              | 0.836(0.466-1.500)          | 0.548             |
|                         | CC+CT     | 235(76.8)   | 106(78.5)          | Ref                |                    | Ref                         |                   |
|                         | TT        | 71(23.2)    | 29(21.5)           | 0.906(0.555-1.477) | 0.691              | 0.890(0.542-1.460)          | 0.644             |
|                         | rs8040868 |             |                    |                    |                    |                             |                   |
|                         | TT        | 147(48.5)   | 61(45.2)           | Ref                | 0.174              | Ref                         | 0.316             |
|                         | TC        | 138(45.5)   | 59(43.7)           | 1.030(0.672-1.579) | 0.891              | 1.029(0.668-1.584)          | 0.898             |
|                         | CC        | 18(5.9)     | 15(11.1)           | 2.008(0.951-4.240) | 0.067              | 1.778(0.833-3.792)          | 0.137             |
|                         | TT+TC     | 285(94.1)   | 120(88.9)          | Ref                |                    | Ref                         |                   |
|                         | CC        | 18(5.9)     | 15(11.1)           | 1.979(0.966-4.056) | 0.062              | 1.753(0.847-3.628)          | 0.130             |
|                         | rs1948    |             |                    |                    |                    |                             |                   |
|                         | CC        | 91(29.9)    | 33(24.6)           | Ref                | 0.318              | Ref                         | 0.318             |
|                         | CT        | 151(49.7)   | 66(49.2)           | 1.205(0.737-1.972) | 0.457              | 1.257(0.763-2.070)          | 0.369             |
| TT                      | 62(20.4)  | 35(26.1)    | 1.557(0.876-2.766) | 0.131              | 1.566(0.875-2.802) | 0.131                       |                   |
| CC+CT                   | 242(79.6) | 99(73.9)    | Ref                |                    | Ref                |                             |                   |
| TT                      | 62(20.4)  | 35(26.1)    | 1.380(0.857-2.221) | 0.185              | 1.353(0.835-2.190) | 0.219                       |                   |

\*P &lt; 0.05.

Supplementary Table 3: The relationship of the three SNPs and survival time

| Genotype  | Cases(%)  | MST(month) | HR(95% CI)         | P value | HR <sub>adj.</sub> (95% CI) | P <sub>adj.</sub> |
|-----------|-----------|------------|--------------------|---------|-----------------------------|-------------------|
| rs6495309 |           |            |                    |         |                             |                   |
| CC        | 90(29.4)  | 13         | Ref                | 0.445   | Ref                         | 0.486             |
| CT        | 153(50.0) | 14.5       | 0.780(0.362-1.681) | 0.526   | 0.768(0.356-1.658)          | 0.502             |
| TT        | 63(20.6)  | 21         | 1.300(0.551-3.070) | 0.549   | 1.242(0.520-2.968)          | 0.625             |
| rs8040868 |           |            |                    |         |                             |                   |
| TT        | 125(40.4) | 22         | Ref                | 0.291   | Ref                         | 0.290             |
| TC        | 148(48.8) | 14         | 1.539(0.743-3.189) | 0.246   | 1.521(0.732-3.160)          | 0.261             |
| CC        | 33(10.8)  | 13         | 2.088(0.782-5.573) | 0.142   | 2.107(0.788-5.633)          | 0.137             |
| rs1948    |           |            |                    |         |                             |                   |
| CC        | 68(22.4)  | 39         | Ref                | 0.23    | Ref                         | 0.214             |
| CT        | 167(55.1) | 12         | 1.179(0.492-2.827) | 0.712   | 1.195(0.497-2.876)          | 0.691             |
| TT        | 68(22.4)  | 13         | 2.033(0.797-5.186) | 0.137   | 2.082(0.814-5.323)          | 0.126             |

MST: median survival time.
